# Supplementary material for: ß-arrestin 2 germline knockout does not attenuate opioid respiratory depression
Source: eLife. 2021 May 18;10:e62552. doi: 10.7554/eLife.62552 (PMC8213404; doi:10.7554/eLife.62552)
Supplement: Figure 2—source data 1. — This source data corresponds to Figure 2 and Table 1 and Table 2. [file elife-62552-fig2-data1.xlsx]

## Sheet: (Raehal & Bohn 2005) Power Calc
Respiratory Frequency (breaths/min)
	Respiratory Suppression (%1-injected/baseline)
		SC dose	WT (n)	WT (mean, estimated)	WT (std, estimated)	Arrb2-KO (n)	Arrb2-KO (mean, estimated)	Arrb2-KO (std, estimated)	reported F	reported P-value	estimated Cohen's d	estimated pooled stdev	Estimated minimum sample size
		Saline	5	5	11.1803	5	5	2.23607	1.79	0.1814	0	8.06226	inf
		20 mg/kg morphine	5	21	4.47214	5	12	4.47214	?	?	-2.01246	4.47214	4
		50 mg/kg morphine	5	35	6.7082	5	7	6.7082	2.622	<0.001	-4.17399	6.7082	1
		100 mg/kg morphine	5	41	11.1803	5	19	7.82624	?	<0.01	-2.31499	9.65013	4
		150 mg/kg morphine	5	43	7.82624	5	22	16.7705	?	<0.01	-1.70754	13.0863	7

## Sheet: Shapiro-Wilks
Normoxia
						Arrb2-wt				Arrb2-het				Arrb2-mut
	Instantaneous Frequency
	WeanID	AnimalID	Genotype		saline	morphine	normalized		saline	morphine	normalized		saline	morphine	normalized
	'371'	'1'	'Arrb2-het'						6.75396	2.69326	0.398768
	'371'	'11'	'Arrb2-het'						5.92921	2.44806	0.412881
	'376'	'3'	'Arrb2-mut'										7.31842	2.30563	0.315044
	'376'	'10'	'Arrb2-mut'										5.89933	2.29944	0.38978
	'377'	'1'	'Arrb2-wt'		7.43545	3.56491	0.479447
	'377'	'2'	'Arrb2-wt'		5.92029	2.92803	0.494575
	'371'	'3'	'Arrb2-mut'										8.19367	2.70723	0.330405
	'371'	'13'	'Arrb2-mut'										8.11758	3.49234	0.430219
	'376'	'1'	'Arrb2-het'						7.83216	2.70015	0.344752
	'376'	'2'	'Arrb2-het'						7.7589	3.3224	0.428205
	'376'	'20'	'Arrb2-het'						8.14472	2.65871	0.326434
	'377'	'3'	'Arrb2-het'						8.65687	3.16793	0.365944
	'377'	'30'	'Arrb2-wt'		6.63079	2.83212	0.427116
	'389'	'2'	'Arrb2-mut'										7.1237	2.84376	0.399196
	'389'	'12'	'Arrb2-mut'										6.2863	2.68387	0.426939
	'389'	'20'	'Arrb2-mut'										6.40929	2.36776	0.369426
	'390'	'1'	'Arrb2-wt'		7.72617	3.58563	0.464089
	'390'	'20'	'Arrb2-wt'		6.92244	3.44942	0.498296
shapiro-wilks real stats p-value					0.852903	0.120047	0.400684		0.557222	0.305482	0.678591		0.470943	0.159492	0.48277
shapiro-wilks matlab p-value							0.394112				0.727324				0.502196
	Peak Flow
	'371'	'1'	'Arrb2-het'						-4.48905	-2.1243	0.473217
	'371'	'11'	'Arrb2-het'						-3.24174	-1.8952	0.584626
	'376'	'3'	'Arrb2-mut'										-3.16643	-1.82196	0.5754
	'376'	'10'	'Arrb2-mut'										-2.74838	-1.71945	0.625625
	'377'	'1'	'Arrb2-wt'		-3.83297	-2.57304	0.671292
	'377'	'2'	'Arrb2-wt'		-4.06708	-2.15163	0.529035
	'371'	'3'	'Arrb2-mut'										-3.16909	-2.21436	0.698738
	'371'	'13'	'Arrb2-mut'										-3.87936	-2.28308	0.58852
	'376'	'1'	'Arrb2-het'						-3.48899	-2.1311	0.610808
	'376'	'2'	'Arrb2-het'						-4.35479	-2.23779	0.51387
	'376'	'20'	'Arrb2-het'						-3.79514	-2.09095	0.550956
	'377'	'3'	'Arrb2-het'						-4.7844	-2.63177	0.550074
	'377'	'30'	'Arrb2-wt'		-3.72501	-2.31247	0.620794
	'389'	'2'	'Arrb2-mut'										-3.34035	-2.29813	0.68799
	'389'	'12'	'Arrb2-mut'										-3.21079	-2.29984	0.716285
	'389'	'20'	'Arrb2-mut'										-2.68431	-2.00705	0.747696
	'390'	'1'	'Arrb2-wt'		-2.91715	-2.05991	0.706137
	'390'	'20'	'Arrb2-wt'		-2.98677	-2.5494	0.853566
shapiro-wilks real stats p-value					0.290304	0.409632	0.889157		0.627395	0.31562	0.908317		0.436901	0.0933612	0.470977
shapiro-wilks matlab p-value							0.922173				0.924182				0.483846

## Sheet: 95% CI
Normoxia Frequency
Mean Freq	SEM	Low	High
7.05	0.34	6.3836	7.7164	MUT saline
2.67	0.16	2.3564	2.9836	MUT morph
0.38	0.017	0.34668	0.41332	ratio
7.51	0.41	6.7064	8.3136	HET saline
2.83	0.14	2.5556	3.1044	HET morph
0.38	0.016	0.34864	0.41136	ratio
6.93	0.32	6.3028	7.5572	WT saline
3.27	0.16	2.9564	3.5836	WT morph
0.47	0.013	0.44452	0.49548	ratio
Normoxia PIF
Mean Freq	SEM	Low	High
-3.17	0.15	-3.464	-2.876	MUT saline
-2.09	0.09	-2.2664	-1.9136	MUT morph
0.66	0.025	0.611	0.709	ratio
-4.03	0.25	-4.52	-3.54	HET saline
-2.19	0.1	-2.386	-1.994	HET morph
0.52	0.02	0.4808	0.5592	ratio
-3.5	0.23	-3.9508	-3.0492	WT saline
-2.33	0.1	-2.526	-2.134	WT morph
0.67	0.02	0.6308	0.7092	ratio

## Sheet: t Test
Normoxia Frequency
Arrb2-wt	Arrb2-het	Arrb2-mut			SD	SE	Average
0.479447	0.398768	0.315044		Mut	0.0446841	0.016889	0.380144
0.494575	0.412881	0.38978		WT	0.0288583	0.0129058	0.472704
0.427116	0.344752	0.330405		Het	0.0401621	0.0163961	0.379497
0.464089	0.428205	0.430219
0.498296	0.326434	0.399196			0.0376129
	0.365944	0.426939
		0.369426
T Test: Two Independent Samples
SUMMARY			Hyp Mean Diff	0
Groups	Count	Mean	Variance	Cohen d
Arrb2-wt	5	0.472704	0.0008328
Arrb2-mut	7	0.380144	0.00199667
Pooled			0.00153112	2.36548
T TEST: Equal Variances				Alpha	0.05
	std err	t-stat	df	p-value	t-crit	lower	upper	sig	effect r
One Tail	0.0229119	4.03983	10	0.00118094	1.81246			yes	0.787441
Two Tail	0.0229119	4.03983	10	0.00236188	2.22814	0.0415092	0.143611	yes	0.787441
T TEST: Unequal Variances				Alpha	0.05
	std err	t-stat	df	p-value	t-crit	lower	upper	sig	effect r
One Tail	0.0212556	4.35464	9.95924	0.00072348	1.81321			yes	0.809724
Two Tail	0.0212556	4.35464	9.95924	0.00144697	2.22938	0.0451736	0.139947	yes	0.809724
Normoxia PIF
Arrb2-wt	Arrb2-het	Arrb2-mut			SD	SE	Average
0.671292	0.473217	0.5754		Mut	0.0664983	0.025134	0.662893
0.529035	0.584626	0.625625		WT	0.119485	0.0534353	0.676165
0.620794	0.610808	0.698738		Het	0.0490986	0.0200444	0.547259
0.706137	0.51387	0.58852
0.853566	0.550956	0.68799			0.0966919
	0.550074	0.716285
		0.747696

## Sheet: One-Way ANOVA
	Normoxia
		Instantaneous Frequency, morphine/saline normalized
			Arrb2-wt	Arrb2-het	Arrb2-mut
			0.479447	0.398768	0.315044
			0.494575	0.412881	0.38978
			0.427116	0.344752	0.330405
			0.464089	0.428205	0.430219
			0.498296	0.326434	0.399196
				0.365944	0.426939
					0.369426
ANOVA: Single Factor, XReal Stats			DESCRIPTION					Alpha	0.05				TUKEY HSD/KRAMER			alpha	0.05
			Group	Count	Sum	Mean	Variance	SS	Std Err	Lower	Upper		group	mean	n	ss	df	q-crit
			Arrb2-wt	5	2.36352	0.472704	0.0008328	0.0033312	0.0176545	0.435075	0.510334		Arrb2-wt	0.472704	5	0.0033312
			Arrb2-het	6	2.27698	0.379497	0.001613	0.00806498	0.0161163	0.345146	0.413848		Arrb2-het	0.379497	6	0.00806498
			Arrb2-mut	7	2.66101	0.380144	0.00199667	0.01198	0.0149208	0.348341	0.411947		Arrb2-mut	0.380144	7	0.01198
															18	0.0233762	15	3.673
			ANOVA										Q TEST
			Sources	SS	df	MS	F	P value	F crit	RMSSE	Omega Sq		group 1	group 2	mean	std err	q-stat	lower	upper	p-value	mean-crit	Cohen d
			Between Groups	0.0311391	2	0.0155695	9.99064	0.00174549	3.68232	1.35846	0.49974		Arrb2-wt	Arrb2-het	0.0932071	0.0169029	5.51426	0.0932071	0.0932071	5.70655e-14	0	#DIV/0!
			Within Groups	0.0233762	15	0.00155841							Arrb2-wt	Arrb2-mut	0.0925602	0.0163449	5.66293	0.0925602	0.0925602	5.70655e-14	0	#DIV/0!
			Total	0.0545152	17	0.00320678							Arrb2-het	Arrb2-mut	0.000646995	0.0155301	0.0416608	0.000646995	0.000646995	0	0	#DIV/0!
		Peak Flow, morphine/saline normalized
			Arrb2-wt	Arrb2-het	Arrb2-mut
			0.671292	0.473217	0.5754							0.95
			0.529035	0.584626	0.625625
			0.620794	0.610808	0.698738
			0.706137	0.51387	0.58852
			0.853566	0.550956	0.68799
				0.550074	0.716285
					0.747696
ANOVA: Single Factor, XReal Stats			DESCRIPTION					Alpha	0.05				TUKEY HSD/KRAMER			alpha	0.05
			Group	Count	Sum	Mean	Variance	SS	Std Err	Lower	Upper		group	mean	n	ss	df	q-crit
			Arrb2-wt	5	3.38082	0.676165	0.0142766	0.0571066	0.0357197	0.60003	0.7523		Arrb2-wt	0.676165	5	0.0571066
			Arrb2-het	6	3.28355	0.547259	0.00241068	0.0120534	0.0326074	0.477758	0.61676		Arrb2-het	0.547259	6	0.0120534
			Arrb2-mut	7	4.64025	0.662893	0.00442203	0.0265322	0.0301886	0.598548	0.727239		Arrb2-mut	0.662893	7	0.0265322
															18	0.0956921	15	3.673
			ANOVA										Q TEST
			Sources	SS	df	MS	F	P value	F crit	RMSSE	Omega Sq		group 1	group 2	mean	std err	q-stat	lower	upper	p-value	mean-crit	Cohen d
			Between Groups	0.0592371	2	0.0296185	4.64279	0.0269508	3.68232	0.887726	0.288132		Arrb2-wt	Arrb2-het	0.128906	0.034199	3.7693	0.128906	0.128906	5.70655e-14	0	#DIV/0!
			Within Groups	0.0956921	15	0.00637947							Arrb2-wt	Arrb2-mut	0.0132715	0.03307	0.401316	0.0132715	0.0132715	5.70655e-14	0	#DIV/0!
			Total	0.154929	17	0.00911348							Arrb2-het	Arrb2-mut	0.115635	0.0314213	3.68013	0.115635	0.115635	5.70655e-14	0	#DIV/0!

## Sheet: Kruskal-Wallis
	Normoxia
		Instantaneous Frequency, morphine/saline normalized
			Arrb2-wt	Arrb2-het	Arrb2-mut
			0.479447	0.398768	0.315044
			0.494575	0.412881	0.38978
			0.427116	0.344752	0.330405
			0.464089	0.428205	0.430219
			0.498296	0.326434	0.399196
				0.365944	0.426939
					0.369426
Kruskal-Wallis Test			Arrb2-wt	Arrb2-het	Arrb2-mut			Pairwise Mann-Whitney tests
		median	0.479447	0.382356	0.38978
		rank sum	78	42	51			group 1	group 2	p-value	mean
		count	5	6	7	18		Arrb2-wt	Arrb2-het	0.0137108	0.0932071
		r^2/n	1216.8	294	371.571	1882.37		Arrb2-wt	Arrb2-mut	0.00936611	0.0925602
		H-stat				9.04812		Arrb2-het	Arrb2-mut	0.943057	0.000646995
		H-ties				9.04812
		df				2
		p-value				0.0108449
		alpha				0.05
		sig				yes
		Peak Flow, morphine/saline normalized
			Arrb2-wt	Arrb2-het	Arrb2-mut
			0.671292	0.473217	0.5754
			0.529035	0.584626	0.625625
			0.620794	0.610808	0.698738
			0.706137	0.51387	0.58852
			0.853566	0.550956	0.68799
				0.550074	0.716285
					0.747696
Kruskal-Wallis Test			Arrb2-wt	Arrb2-het	Arrb2-mut			Pairwise Mann-Whitney tests
		median	0.671292	0.550515	0.68799
		rank sum	58	28	85			group 1	group 2	p-value	mean
		count	5	6	7	18		Arrb2-wt	Arrb2-het	0.0552343	0.128906
		r^2/n	672.8	130.667	1032.14	1835.61		Arrb2-wt	Arrb2-mut	1	0.0132715
		H-stat				7.40735		Arrb2-het	Arrb2-mut	0.0124193	0.115635
		H-ties				7.40735
		df				2
		p-value				0.0246328
		alpha				0.05
		sig				yes

## Sheet: Two-Way ANOVA
Normoxia PIF
Condition	genotype	mean
Saline	HO	-3.16643		Descriptive Statistics						Two Factor Anova (via Regression)
Saline	HO	-2.74838
Saline	HO	-3.16909		COUNT	unbalanced					ANOVA				Alpha	0.05
Saline	HO	-3.87936			HE	HO	W				SS	df	MS	F	p-value	sig
Saline	HO	-3.34035		Morphine	6	7	5	18		Rows	16.4657	1	16.4657	103.815	2.95313e-11	yes
Saline	HO	-3.21079		Saline	6	7	5	18		Columns	1.48332	2	0.74166	4.67611	0.0170719	yes
Saline	HO	-2.68431			12	14	10	36		Inter	1.05265	2	0.526326	3.31844	0.0498931	yes
Saline	HE	-4.48905								Within	4.75819	30	0.158606
Saline	HE	-3.24174		MEAN						Total	23.941	35	0.684029
Saline	HE	-3.48899			HE	HO	W
Saline	HE	-4.35479		Morphine	-2.18519	-2.09198	-2.32929	-2.20215
Saline	HE	-3.79514		Saline	-4.02568	-3.17124	-3.5058	-3.56757
Saline	HE	-4.7844			-3.10544	-2.63161	-2.91754	-2.88486
Saline	W	-3.83297											Significant interaction due to lower PIF of HET at baseline
Saline	W	-4.06708		VARIANCE									This effect is minimized with hypercapnia
Saline	W	-3.72501			HE	HO	W
Saline	W	-2.91715		Morphine	0.0603618	0.0593499	0.0530701	0.0608569
Saline	W	-2.98677		Saline	0.370886	0.157922	0.271509	0.368211
Morphine	HO	-1.82196			1.11986	0.413881	0.528748	0.684029
Morphine	HO	-1.71945
Morphine	HO	-2.21436
Morphine	HO	-2.28308
Morphine	HO	-2.29813
Morphine	HO	-2.29984
Morphine	HO	-2.00705
Morphine	HE	-2.1243
Morphine	HE	-1.8952
Morphine	HE	-2.1311
Morphine	HE	-2.23779
Morphine	HE	-2.09095
Morphine	HE	-2.63177
Morphine	W	-2.57304
Morphine	W	-2.15163
Morphine	W	-2.31247
Morphine	W	-2.05991
Morphine	W	-2.5494
Normoxia Freq
Condition	genotype	mean
Saline	HO	7.31842		Descriptive Statistics						Two Factor Anova (via Regression)
Saline	HO	5.89933
Saline	HO	8.19367		COUNT	unbalanced					ANOVA				Alpha	0.05
Saline	HO	8.11758			HE	HO	W				SS	df	MS	F	p-value	sig
Saline	HO	7.1237		Morphine	6	7	5	18		Rows	158.63	1	158.63	340.894	6.23688e-18	yes
Saline	HO	6.2863		Saline	6	7	5	18		Columns	0.692719	2	0.34636	0.744323	0.483625	no
Saline	HO	6.40929			12	14	10	36		Inter	1.49247	2	0.746236	1.60365	0.217929	no
Saline	HE	6.75396								Within	13.9601	30	0.465335
Saline	HE	5.92921		MEAN						Total	180.877	35	5.16791
Saline	HE	7.83216			HE	HO	W
Saline	HE	7.7589		Morphine	2.83175	2.67143	3.27202	2.92507
Saline	HE	8.14472		Saline	7.51264	7.04976	6.92703	7.16314
Saline	HE	8.65687			5.1722	4.8606	5.09952	5.04411
Saline	W	7.43545
Saline	W	5.92029		VARIANCE
Saline	W	6.63079			HE	HO	W
Saline	W	7.72617		Morphine	0.113483	0.178237	0.131863	0.1911
Saline	W	6.92244		Saline	0.990876	0.807162	0.499605	0.758621
Morphine	HO	2.30563			6.47762	5.61589	3.99151	5.16791
Morphine	HO	2.29944
Morphine	HO	2.70723
Morphine	HO	3.49234
Morphine	HO	2.84376
Morphine	HO	2.68387
Morphine	HO	2.36776
Morphine	HE	2.69326
Morphine	HE	2.44806
Morphine	HE	2.70015
Morphine	HE	3.3224
Morphine	HE	2.65871
Morphine	HE	3.16793
Morphine	W	3.56491
Morphine	W	2.92803
Morphine	W	2.83212
Morphine	W	3.58563
Morphine	W	3.44942

## Sheet: Power Analysis
Normoxia Frequency							Normoxia PIF
Cohen D	Power	Hypothetic +/+ mean	Percent Change				Cohen D	Power	Hypothetic +/+ mean	Percent Change
0	0.05	0.380144	0	0.380144	MUT Avg		0	0.05	0.662893	0	0.662893	MUT Avg
0.05	0.0587858	0.378264	0.00494719	0.472704	WT Avg		0.05	0.0587858	0.658059	0.00729318	0.676165	WT Avg
0.1	0.0687364	0.376383	0.00989439	0.0376129	Pooled SD		0.1	0.0687364	0.653224	0.0145864	0.096692	Pooled SD
0.15	0.0799343	0.374502	0.0148416				0.15	0.0799343	0.64839	0.0218795
0.2	0.0924554	0.372622	0.0197888				0.2	0.0924554	0.643555	0.0291727
0.25	0.106367	0.370741	0.024736				0.25	0.106367	0.63872	0.0364659
0.3	0.121725	0.36886	0.0296832				0.3	0.121725	0.633886	0.0437591
0.35	0.138572	0.36698	0.0346304				0.35	0.138572	0.629051	0.0510522
0.4	0.156936	0.365099	0.0395775				0.4	0.156936	0.624217	0.0583454
0.45	0.176825	0.363218	0.0445247				0.45	0.176825	0.619382	0.0656386
0.5	0.198231	0.361338	0.0494719				0.5	0.198231	0.614547	0.0729318
0.55	0.221122	0.359457	0.0544191				0.55	0.221122	0.609713	0.0802249
0.6	0.245447	0.357577	0.0593663				0.6	0.245447	0.604878	0.0875181
0.65	0.271132	0.355696	0.0643135				0.65	0.271132	0.600044	0.0948113
0.7	0.298083	0.353815	0.0692607				0.7	0.298083	0.595209	0.102104
0.75	0.326182	0.351935	0.0742079				0.75	0.326182	0.590374	0.109398
0.8	0.355296	0.350054	0.0791551				0.8	0.355296	0.58554	0.116691
0.85	0.38527	0.348173	0.0841023				0.85	0.38527	0.580705	0.123984
0.9	0.415936	0.346293	0.0890495				0.9	0.415936	0.575871	0.131277
0.95	0.447113	0.344412	0.0939967				0.95	0.447113	0.571036	0.13857
1	0.478609	0.342531	0.0989439				1	0.478609	0.566201	0.145864
1.05	0.51023	0.340651	0.103891				1.05	0.51023	0.561367	0.153157
1.1	0.541776	0.33877	0.108838				1.1	0.541776	0.556532	0.16045
1.15	0.573051	0.336889	0.113785				1.15	0.573051	0.551698	0.167743
1.2	0.603864	0.335009	0.118733				1.2	0.603864	0.546863	0.175036
1.25	0.634031	0.333128	0.12368				1.25	0.634031	0.542028	0.182329
1.3	0.663382	0.331247	0.128627				1.3	0.663382	0.537194	0.189623
1.35	0.691761	0.329367	0.133574				1.35	0.691761	0.532359	0.196916
1.4	0.719029	0.327486	0.138521				1.4	0.719029	0.527525	0.204209
1.45	0.745066	0.325605	0.143469				1.45	0.745066	0.52269	0.211502
1.5	0.769775	0.323725	0.148416				1.5	0.769775	0.517855	0.218795
1.55	0.793076	0.321844	0.153363				1.55	0.793076	0.513021	0.226088
1.6	0.814914	0.319964	0.15831				1.6	0.814914	0.508186	0.233382
1.65	0.835253	0.318083	0.163257				1.65	0.835253	0.503352	0.240675
1.7	0.85408	0.316202	0.168205				1.7	0.85408	0.498517	0.247968
1.75	0.871399	0.314322	0.173152				1.75	0.871399	0.493682	0.255261
1.8	0.887232	0.312441	0.178099				1.8	0.887232	0.488848	0.262554
1.85	0.901617	0.31056	0.183046				1.85	0.901617	0.484013	0.269847
1.9	0.914607	0.30868	0.187993				1.9	0.914607	0.479179	0.277141
1.95	0.926264	0.306799	0.192941				1.95	0.926264	0.474344	0.284434
2	0.93666	0.304918	0.197888				2	0.93666	0.469509	0.291727
