# Supplementary material for: ß-arrestin 2 germline knockout does not attenuate opioid respiratory depression
Source: eLife. 2021 May 18;10:e62552. doi: 10.7554/eLife.62552 (PMC8213404; doi:10.7554/eLife.62552)
Supplement: Figure 3—source data 1. — This source data corresponds to Figure 3 and Table 3 and Table 4. [file elife-62552-fig3-data1.xlsx]

## Sheet: Shapiro-Wilks
Hypercapnia
						Arrb2-wt				Arrb2-het				Arrb2-mut
	Instantaneous Frequency
	WeanID	AnimalID	Genotype		saline	morphine	normalized		saline	morphine	normalized		saline	morphine	normalized
	'371'	'1'	'Arrb2-het'						7.4499	4.77333	0.640724
	'371'	'11'	'Arrb2-het'						7.07344	5.60752	0.792758
	'376'	'3'	'Arrb2-mut'										8.10131	5.05221	0.623628
	'376'	'10'	'Arrb2-mut'										7.80025	5.31616	0.681537
	'377'	'1'	'Arrb2-wt'		8.64378	5.67003	0.655967
	'377'	'2'	'Arrb2-wt'		6.6287	5.43762	0.820315
	'371'	'3'	'Arrb2-mut'										8.17673	5.25893	0.643158
	'371'	'13'	'Arrb2-mut'										7.18954	4.89524	0.680883
	'376'	'1'	'Arrb2-het'						8.03719	4.33656	0.539562
	'376'	'2'	'Arrb2-het'						7.27432	4.42081	0.607729
	'376'	'20'	'Arrb2-het'						8.00107	5.0507	0.631253
	'377'	'3'	'Arrb2-het'						8.23015	4.55052	0.552908
	'377'	'30'	'Arrb2-wt'		7.19767	5.59871	0.77785
	'389'	'2'	'Arrb2-mut'										7.75811	5.1496	0.66377
	'389'	'12'	'Arrb2-mut'										7.67298	5.02066	0.65433
	'389'	'20'	'Arrb2-mut'										7.10812	5.73701	0.807106
	'390'	'1'	'Arrb2-wt'		8.59749	4.69061	0.545579
	'390'	'20'	'Arrb2-wt'		7.76881	5.48972	0.706636
shapiro-wilks real stats p-value					0.455672	0.0526357	0.827052		0.412582	0.410922	0.28279		0.424587	0.419868	0.032934
shapiro-wilks matlab p-value							0.873211				0.234739				0.0174124
	Peak Flow
	'371'	'1'	'Arrb2-het'						-5.24115	-3.60309	0.687463
	'371'	'11'	'Arrb2-het'						-5.36504	-3.68552	0.686951
	'376'	'3'	'Arrb2-mut'										-4.5375	-3.04245	0.670513
	'376'	'10'	'Arrb2-mut'										-4.55537	-3.00374	0.659384
	'377'	'1'	'Arrb2-wt'		-6.05802	-4.22004	0.696604
	'377'	'2'	'Arrb2-wt'		-5.17886	-3.39276	0.655117
	'371'	'3'	'Arrb2-mut'										-5.42525	-3.35025	0.61753
	'371'	'13'	'Arrb2-mut'										-5.2098	-3.72971	0.715904
	'376'	'1'	'Arrb2-het'						-5.32516	-4.51314	0.847512
	'376'	'2'	'Arrb2-het'						-6.05721	-4.1143	0.67924
	'376'	'20'	'Arrb2-het'						-5.54164	-3.47413	0.626915
	'377'	'3'	'Arrb2-het'						-6.94008	-3.75269	0.540726
	'377'	'30'	'Arrb2-wt'		-6.29932	-4.61785	0.733071
	'389'	'2'	'Arrb2-mut'										-6.09313	-3.86418	0.634187
	'389'	'12'	'Arrb2-mut'										-6.23577	-4.0106	0.64316
	'389'	'20'	'Arrb2-mut'										-5.32156	-3.78944	0.712092
	'390'	'1'	'Arrb2-wt'		-5.57311	-3.4173	0.613176
	'390'	'20'	'Arrb2-wt'		-5.46441	-3.99366	0.73085
shapiro-wilks real stats p-value					0.680319	0.453353	0.429057		0.0731074	0.366909	0.462577		0.424134	0.303565	0.471044
shapiro-wilks matlab p-value							0.442248				0.486279				0.481495

## Sheet: 95% CI
Hypercapnia Frequency
Mean Freq	SEM	Low	High
7.68	0.19	7.3076	8.0524	MUT saline
5.2	0.1	5.004	5.396	MUT morph
0.68	0.02	0.6408	0.7192	ratio
7.69	0.16	7.3764	8.0036	HET saline
4.79	0.19	4.4176	5.1624	HET morph
0.63	0.04	0.5516	0.7084	ratio
7.77	0.39	7.0056	8.5344	WT saline
5.38	0.18	5.0272	5.7328	WT morph
0.7	0.05	0.602	0.798	ratio
Hypercapnia PIF
Mean Freq	SEM	Low	High
-5.34	0.27	-5.8692	-4.8108	MUT saline
-3.54	0.16	-3.8536	-3.2264	MUT morph
0.66	0.01	0.6404	0.6796	ratio
-5.75	0.25	-6.24	-5.26	HET saline
-3.86	0.15	-4.154	-3.566	HET morph
0.69	0.04	0.6116	0.7684	ratio
-5.71	0.2	-6.102	-5.318	WT saline
-3.93	0.24	-4.4004	-3.4596	WT morph
0.68	0.02	0.6408	0.7192	ratio

## Sheet: t Test
Hypercapnia PIF
Arrb2-wt	Arrb2-het	Arrb2-mut			SD	SE	Average
0.696604	0.687463	0.670513		Mut	0.0377491	0.0142678	0.664681
0.655117	0.686951	0.659384		WT	0.0514697	0.0230179	0.685764
0.733071	0.847512	0.61753		Het	0.100359	0.0409712	0.678135
0.613176	0.67924	0.715904
0.73085	0.626915	0.634187			0.0451338
	0.540726	0.64316
		0.712092
T Test: Two Independent Samples
SUMMARY			Hyp Mean Diff	0
Groups	Count	Mean	Variance	Cohen d
Arrb2-wt	5	0.685764	0.00264913
Arrb2-mut	7	0.664681	0.00142499
Pooled			0.00191465	0.481808
T TEST: Equal Variances				Alpha	0.05
	std err	t-stat	df	p-value	t-crit	lower	upper	sig	effect r
One Tail	0.0256213	0.822845	10	0.214891	1.81246			no	0.251821
Two Tail	0.0256213	0.822845	10	0.429781	2.22814	-0.0360055	0.0781701	no	0.251821
T TEST: Unequal Variances				Alpha	0.05
	std err	t-stat	df	p-value	t-crit	lower	upper	sig	effect r
One Tail	0.0270813	0.778484	6.97756	0.230931	1.8955			no	0.282691
Two Tail	0.0270813	0.778484	6.97756	0.461862	2.36617	-0.0429965	0.0851612	no	0.282691

## Sheet: MWU
Hypercapnia Frequency
Arrb2-wt	Arrb2-het	Arrb2-mut
0.655967	0.640724	0.623628
0.820315	0.792758	0.681537
0.77785	0.539562	0.643158
0.545579	0.607729	0.680883
0.706636	0.631253	0.66377
	0.552908	0.65433
		0.807106
Mann-Whitney Test for Two Independent Samples
					U-crit	5
	Arrb2-wt	Arrb2-mut			alpha	0.0423571
count	5	7			lower	-0.118192
median	0.706636	0.66377			upper	0.154222
rank sum	37	41			median	0.0257536
U	13	22			U-crit+	6
					alpha	0.0618185
	one tail	two tail			lower	-0.108752
U	13				upper	0.139432
mean	17.5
std dev	6.15765	ties
z-score	0.730798
effect r	0.210963
p-norm	0.232451	0.464902
p-exact	0.265152	0.530303
p-simul	0.2699	0.537
		U-stat	13
		z-stat	0.649598
		effect r	0.187523
		p-norm	0.515952
		p-exact	0.530303
		p-simul	0.5243

## Sheet: One-Way ANOVA
	Hypercapnia
		Instantaneous Frequency, morphine/saline normalized
			Arrb2-wt	Arrb2-het	Arrb2-mut
			0.655967	0.640724	0.623628
			0.820315	0.792758	0.681537
			0.77785	0.539562	0.643158
			0.545579	0.607729	0.680883
			0.706636	0.631253	0.66377
				0.552908	0.65433
					0.807106
ANOVA: Single Factor, XReal Stats			DESCRIPTION					Alpha	0.05
			Group	Count	Sum	Mean	Variance	SS	Std Err	Lower	Upper
			Arrb2-wt	5	3.50635	0.701269	0.0115893	0.0463571	0.0381499	0.619955	0.782584
			Arrb2-het	6	3.76493	0.627489	0.00823742	0.0411871	0.034826	0.553259	0.701719
			Arrb2-mut	7	4.75441	0.679202	0.00360202	0.0216121	0.0322426	0.610478	0.747925
			ANOVA
			Sources	SS	df	MS	F	P value	F crit	RMSSE	Omega Sq
			Between Groups	0.0162593	2	0.00812966	1.11716	0.352963	3.68232	0.44393	0.0128502
			Within Groups	0.109156	15	0.00727709
			Total	0.125416	17	0.00737739
		Peak Flow, morphine/saline normalized
			Arrb2-wt	Arrb2-het	Arrb2-mut
			0.696604	0.687463	0.670513
			0.655117	0.686951	0.659384
			0.733071	0.847512	0.61753
			0.613176	0.67924	0.715904
			0.73085	0.626915	0.634187
				0.540726	0.64316
					0.712092
ANOVA: Single Factor, XReal Stats			DESCRIPTION					Alpha	0.05
			Group	Count	Sum	Mean	Variance	SS	Std Err	Lower	Upper
			Arrb2-wt	5	3.42882	0.685764	0.00264913	0.0105965	0.0304425	0.620877	0.75065
			Arrb2-het	6	4.06881	0.678135	0.0100719	0.0503593	0.02779	0.618902	0.737368
			Arrb2-mut	7	4.65277	0.664681	0.00142499	0.00854995	0.0257286	0.609842	0.71952
			ANOVA
			Sources	SS	df	MS	F	P value	F crit	RMSSE	Omega Sq
			Between Groups	0.00138356	2	0.000691779	0.149293	0.862581	3.68232	0.156812	-0.10439
			Within Groups	0.0695058	15	0.00463372
			Total	0.0708893	17	0.00416996

## Sheet: Kruskal-Wallis
	Hypercapnia
		Instantaneous Frequency, morphine/saline normalized
			Arrb2-wt	Arrb2-het	Arrb2-mut
			0.655967	0.640724	0.623628
			0.820315	0.792758	0.681537
			0.77785	0.539562	0.643158
			0.545579	0.607729	0.680883
			0.706636	0.631253	0.66377
				0.552908	0.65433
					0.807106
Kruskal-Wallis Test			Arrb2-wt	Arrb2-het	Arrb2-mut
		median	0.706636	0.619491	0.66377
		rank sum	59	37	75
		count	5	6	7	18
		r^2/n	696.2	228.167	803.571	1727.94
		H-stat				3.62941
		H-ties				3.62941
		df				2
		p-value				0.162886
		alpha				0.05
		sig				no
		Peak Flow, morphine/saline normalized
			Arrb2-wt	Arrb2-het	Arrb2-mut
			0.696604	0.687463	0.670513
			0.655117	0.686951	0.659384
			0.733071	0.847512	0.61753
			0.613176	0.67924	0.715904
			0.73085	0.626915	0.634187
				0.540726	0.64316
					0.712092
Kruskal-Wallis Test			Arrb2-wt	Arrb2-het	Arrb2-mut
		median	0.696604	0.683096	0.659384
		rank sum	55	56	60
		count	5	6	7	18
		r^2/n	605	522.667	514.286	1641.95
		H-stat				0.612364
		H-ties				0.612364
		df				2
		p-value				0.736253
		alpha				0.05
		sig				no

## Sheet: Two-Way ANOVA
Hypercapnia Freq
Condition	genotype	mean
Saline	HO	8.10131		Descriptive Statistics						Two Factor Anova (via Regression)
Saline	HO	7.80025
Saline	HO	8.17673		COUNT	unbalanced					ANOVA				Alpha	0.05
Saline	HO	7.18954			HE	HO	W				SS	df	MS	F	p-value	sig
Saline	HO	7.75811		Morphine	6	7	5	18		Rows	59.0949	1	59.0949	238.856	7.90275e-16	yes
Saline	HO	7.67298		Saline	6	7	5	18		Columns	0.653684	2	0.326842	1.32107	0.28193	no
Saline	HO	7.10812			12	14	10	36		Inter	0.406494	2	0.203247	0.821506	0.449419	no
Saline	HE	7.4499								Within	7.42223	30	0.247408
Saline	HE	7.07344		MEAN						Total	68.9424	35	1.96978
Saline	HE	8.03719			HE	HO	W
Saline	HE	7.27432		Morphine	4.78991	5.20426	5.37734	5.12383
Saline	HE	8.00107		Saline	7.67768	7.68672	7.76729	7.71056
Saline	HE	8.23015			6.23379	6.44549	6.57231	6.4172
Saline	W	8.64378
Saline	W	6.6287		VARIANCE
Saline	W	7.19767			HE	HO	W
Saline	W	8.59749		Morphine	0.227169	0.0757742	0.155635	0.191001
Saline	W	7.76881		Saline	0.22375	0.168689	0.769579	0.307964
Morphine	HO	5.05221			2.4793	1.772	1.99784	1.96978
Morphine	HO	5.31616
Morphine	HO	5.25893
Morphine	HO	4.89524
Morphine	HO	5.1496
Morphine	HO	5.02066
Morphine	HO	5.73701
Morphine	HE	4.77333
Morphine	HE	5.60752
Morphine	HE	4.33656
Morphine	HE	4.42081
Morphine	HE	5.0507
Morphine	HE	4.55052
Morphine	W	5.67003
Morphine	W	5.43762
Morphine	W	5.59871
Morphine	W	4.69061
Morphine	W	5.48972
Hypercapnia PIF
Condition	genotype	mean
Saline	HO	-4.5375		Descriptive Statistics						Two Factor Anova (via Regression)
Saline	HO	-4.55537
Saline	HO	-5.42525		COUNT	unbalanced					ANOVA				Alpha	0.05
Saline	HO	-5.2098			HE	HO	W				SS	df	MS	F	p-value	sig
Saline	HO	-6.09313		Morphine	6	7	5	18		Rows	29.3897	1	29.3897	103.954	2.90725e-11	yes
Saline	HO	-6.23577		Saline	6	7	5	18		Columns	1.17202	2	0.586008	2.07276	0.143487	no
Saline	HO	-5.32156			12	14	10	36		Inter	0.0180876	2	0.00904379	0.0319886	0.968551	no
Saline	HE	-5.24115								Within	8.48157	30	0.282719
Saline	HE	-5.36504		MEAN						Total	39.6428	35	1.13265
Saline	HE	-5.32516			HE	HO	W
Saline	HE	-6.05721		Morphine	-3.85715	-3.54148	-3.92832	-3.77565
Saline	HE	-5.54164		Saline	-5.74505	-5.33977	-5.71474	-5.59985
Saline	HE	-6.94008			-4.8011	-4.44063	-4.82153	-4.68775
Saline	W	-6.05802
Saline	W	-5.17886		VARIANCE
Saline	W	-6.29932			HE	HO	W
Saline	W	-5.57311		Morphine	0.149613	0.165981	0.278196	0.199333
Saline	W	-5.46441		Saline	0.42831	0.442304	0.207365	0.369589
Morphine	HO	-3.04245			1.23474	1.15139	1.10228	1.13265
Morphine	HO	-3.00374
Morphine	HO	-3.35025
Morphine	HO	-3.72971
Morphine	HO	-3.86418
Morphine	HO	-4.0106
Morphine	HO	-3.78944
Morphine	HE	-3.60309
Morphine	HE	-3.68552
Morphine	HE	-4.51314
Morphine	HE	-4.1143
Morphine	HE	-3.47413
Morphine	HE	-3.75269
Morphine	W	-4.22004
Morphine	W	-3.39276
Morphine	W	-4.61785
Morphine	W	-3.4173
Morphine	W	-3.99366

## Sheet: Power Analysis
	Hypercapnia Frequency							Hypercapnia PIF
	Cohen D	Power	Hypothetic +/+ mean	Percent Change				Cohen D	Power	Hypothetic +/+ mean	Percent Change
	0	0.05	0.679202	0	0.679202	MUT Avg		0	0.05	0.664681	0	0.664681	MUT Avg
	0.05	0.0587858	0.674844	0.00641584	0.701269	WT Avg		0.05	0.0587858	0.662425	0.00339515	0.685764	WT Avg
	0.1	0.0687364	0.670487	0.0128317	0.087153	Pooled SD		0.1	0.0687364	0.660168	0.00679029	0.0451338	Pooled SD
	0.15	0.0799343	0.666129	0.0192475				0.15	0.0799343	0.657911	0.0101854
	0.2	0.0924554	0.661771	0.0256634				0.2	0.0924554	0.655654	0.0135806
	0.25	0.106367	0.657414	0.0320792				0.25	0.106367	0.653398	0.0169757
	0.3	0.121725	0.653056	0.0384951				0.3	0.121725	0.651141	0.0203709
	0.35	0.138572	0.648698	0.0449109				0.35	0.138572	0.648884	0.023766
	0.4	0.156936	0.644341	0.0513267				0.4	0.156936	0.646628	0.0271612
	0.45	0.176825	0.639983	0.0577426				0.45	0.176825	0.644371	0.0305563
	0.5	0.198231	0.635625	0.0641584				0.5	0.198231	0.642114	0.0339515
	0.55	0.221122	0.631268	0.0705743				0.55	0.221122	0.639858	0.0373466
	0.6	0.245447	0.62691	0.0769901				0.6	0.245447	0.637601	0.0407418
	0.65	0.271132	0.622552	0.0834059				0.65	0.271132	0.635344	0.0441369
	0.7	0.298083	0.618195	0.0898218				0.7	0.298083	0.633088	0.0475321
	0.75	0.326182	0.613837	0.0962376				0.75	0.326182	0.630831	0.0509272
	0.8	0.355296	0.609479	0.102653				0.8	0.355296	0.628574	0.0543224
	0.85	0.38527	0.605122	0.109069				0.85	0.38527	0.626317	0.0577175
	0.9	0.415936	0.600764	0.115485				0.9	0.415936	0.624061	0.0611127
	0.95	0.447113	0.596407	0.121901				0.95	0.447113	0.621804	0.0645078
	1	0.478609	0.592049	0.128317				1	0.478609	0.619547	0.0679029
	1.05	0.51023	0.587691	0.134733				1.05	0.51023	0.617291	0.0712981
	1.1	0.541776	0.583334	0.141149				1.1	0.541776	0.615034	0.0746932
	1.15	0.573051	0.578976	0.147564				1.15	0.573051	0.612777	0.0780884
	1.2	0.603864	0.574618	0.15398				1.2	0.603864	0.610521	0.0814835
	1.25	0.634031	0.570261	0.160396				1.25	0.634031	0.608264	0.0848787
	1.3	0.663382	0.565903	0.166812				1.3	0.663382	0.606007	0.0882738
	1.35	0.691761	0.561545	0.173228				1.35	0.691761	0.603751	0.091669
	1.4	0.719029	0.557188	0.179644				1.4	0.719029	0.601494	0.0950641
	1.45	0.745066	0.55283	0.186059				1.45	0.745066	0.599237	0.0984593
	1.5	0.769775	0.548472	0.192475				1.5	0.769775	0.596981	0.101854
	1.55	0.793076	0.544115	0.198891				1.55	0.793076	0.594724	0.10525
	1.6	0.814914	0.539757	0.205307				1.6	0.814914	0.592467	0.108645
	1.65	0.835253	0.535399	0.211723				1.65	0.835253	0.59021	0.11204
	1.7	0.85408	0.531042	0.218139				1.7	0.85408	0.587954	0.115435
	1.75	0.871399	0.526684	0.224554				1.75	0.871399	0.585697	0.11883
	1.8	0.887232	0.522326	0.23097				1.8	0.887232	0.58344	0.122225
	1.85	0.901617	0.517969	0.237386				1.85	0.901617	0.581184	0.12562
	1.9	0.914607	0.513611	0.243802				1.9	0.914607	0.578927	0.129016
	1.95	0.926264	0.509253	0.250218				1.95	0.926264	0.57667	0.132411
	2	0.93666	0.504896	0.256634				2	0.93666	0.574414	0.135806
