# Supplementary material for: ß-arrestin 2 germline knockout does not attenuate opioid respiratory depression
Source: eLife. 2021 May 18;10:e62552. doi: 10.7554/eLife.62552 (PMC8213404; doi:10.7554/eLife.62552)
Supplement: Figure 4—source data 1. — The data contains raw and normalized data and corresponding statistical tests for each Arrb2 genotype. [file elife-62552-fig4-data1.xlsx]

## Sheet: Normalized to Baseline
Genotype	recid	doses	avg_freq	avg_instfreq	avg_amp
Arrb2-het	rec01	0	1	1	1
Arrb2-het	rec03	0	1	1	1
Arrb2-het	rec05	0	1	1	1
Arrb2-het	rec08	0	1	1	1
Arrb2-het	rec10	0	1	1	1
Arrb2-het	rec13	0	1	1	1
Arrb2-het	rec16	0	1	1	1
Arrb2-het	rec17	0	1	1	1
Arrb2-het	rec18	0	1	1	1
Arrb2-het	rec20	0	1	1	1
Arrb2-het	rec23	0	1	1	1
Arrb2-het	rec28	0	1	1	1
Arrb2-het	rec30	0	1	1	1
Arrb2-het	rec31	0	1	1	1
Arrb2-het	rec32	0	1	1	1
Arrb2-het	rec33	0	1	1	1
Arrb2-het	rec34	0	1	1	1
Arrb2-het	rec36	0	1	1	1
Arrb2-het	rec41	0	1	1	1
Arrb2-het	rec42	0	1	1	1
Arrb2-ko	rec09	0	1	1	1
Arrb2-ko	rec11	0	1	1	1
Arrb2-ko	rec35	0	1	1	1
Arrb2-ko	rec37	0	1	1	1
Arrb2-ko	rec39	0	1	1	1
Arrb2-ko	rec40	0	1	1	1
Arrb2-wt	rec12	0	1	1	1
Arrb2-wt	rec15	0	1	1	1
Arrb2-wt	rec22	0	1	1	1
Arrb2-wt	rec27	0	1	1	1
Arrb2-wt	rec29	0	1	1	1
Arrb2-het	rec01	20	0.068966	1.2476	2.4842
Arrb2-het	rec03	20	0.54348	1.0571	0.78163
Arrb2-het	rec05	20	0.25	0.18631	0.86173
Arrb2-het	rec08	20	0.090909	0.19597	1.1911
Arrb2-het	rec10	20	0.44	0.41082	0.90956
Arrb2-het	rec13	20	0	0	0
Arrb2-het	rec16	20	0.029412	0.044002	1.0974
Arrb2-het	rec17	20	0.30303	0.52458	0.99682
Arrb2-het	rec18	20	0.52778	0.49301	1.0528
Arrb2-het	rec20	20	0.125	0.25333	1.0221
Arrb2-het	rec23	20	0.055556	0.02358	1.0388
Arrb2-het	rec28	20	0.48	0.34794	1.0292
Arrb2-het	rec30	20	0.55263	0.6764	1.024
Arrb2-het	rec31	20	0.34615	0.52699	1.1364
Arrb2-het	rec32	20	0.44828	0.89079	1.015
Arrb2-het	rec33	20	0	0	0
Arrb2-het	rec34	20	0.70588	1.1074	0.59042
Arrb2-het	rec36	20	0.67647	0.8297	0.9107
Arrb2-het	rec41	20	0.52632	0.27215	0.90053
Arrb2-het	rec42	20	0.16667	0.10997	1.1703
Arrb2-ko	rec09	20	0	0	0
Arrb2-ko	rec11	20	0.19444	0.42785	1.0413
Arrb2-ko	rec35	20	0	0	0
Arrb2-ko	rec37	20	0	0	0
Arrb2-ko	rec39	20	0	0	0
Arrb2-ko	rec40	20	0.22727	0.31585	0.84566
Arrb2-wt	rec12	20	0.25	0.38747	0.73943
Arrb2-wt	rec15	20	0	0	0
Arrb2-wt	rec22	20	0.45882	0.44553	0.55379
Arrb2-wt	rec27	20	0.027027	0.010091	0.77314
Arrb2-wt	rec29	20	0.51852	0.5366	1.1443
Arrb2-het	rec01	50	0.034483	0.035546	2.7012
Arrb2-het	rec03	50	0.021739	0.011894	0.40468
Arrb2-het	rec05	50	0	0	0
Arrb2-het	rec08	50	0.18182	0.63458	1.0696
Arrb2-het	rec10	50	0	0	0
Arrb2-het	rec13	50	0.021277	0.010582	0.61805
Arrb2-het	rec16	50	0	0	0
Arrb2-het	rec17	50	0.030303	0.01222	0.97711
Arrb2-het	rec18	50	0	0	0
Arrb2-het	rec20	50	0	0	0
Arrb2-het	rec23	50	0	0	0
Arrb2-het	rec28	50	0	0	0
Arrb2-het	rec30	50	0.078947	0.41009	0.87499
Arrb2-het	rec31	50	0.19231	1.4699	1.1338
Arrb2-het	rec32	50	0.068966	0.23149	0.74904
Arrb2-het	rec33	50	0.30435	1.4697	1.2776
Arrb2-het	rec34	50	0	0	0
Arrb2-het	rec36	50	0.088235	0.13656	0.86656
Arrb2-het	rec41	50	0.26316	0.26286	0.81021
Arrb2-het	rec42	50	0	0	0
Arrb2-ko	rec09	50	0.052632	0.022472	0.73988
Arrb2-ko	rec11	50	0	0	0
Arrb2-ko	rec35	50	0.11765	0.034624	0.82602
Arrb2-ko	rec37	50	0.088235	1.438	1.3974
Arrb2-ko	rec39	50	0.088235	0.70502	0.55048
Arrb2-ko	rec40	50	0	0	0
Arrb2-wt	rec12	50	0.16667	0.11456	0.69021
Arrb2-wt	rec15	50	0.16667	0.74784	0.61487
Arrb2-wt	rec22	50	0	0	0
Arrb2-wt	rec27	50	0	0	0
Arrb2-wt	rec29	50	0.074074	0.060805	0.88564
Arrb2-het	rec41	70	0.36842	0.36927	0.87653

## Sheet: Shapiro-Wilks - to baseline
20 nM DAMGO
HET	WT	KO		HET	KO	WT
0.068966	0.25	0		2.4842	0	0.73943
0.54348	0	0.19444		0.78163	1.0413	0
0.25	0.45882	0		0.86173	0	0.55379
0.090909	0.027027	0		1.1911	0	0.77314
0.44	0.51852	0		0.90956	0	1.1443
0		0.22727		0	0.84566
0.029412				1.0974
0.30303				0.99682
0.52778				1.0528
0.125				1.0221
0.055556				1.0388
0.48				1.0292
0.55263				1.024
0.34615				1.1364
0.44828				1.015
0				0
0.70588				0.59042
0.67647				0.9107
0.52632				0.90053
0.16667				1.1703
0.0871632	0.356959	0.005		0.005	0.005	0.65135
50nM DAMGO
HET	WT	KO		HET	KO	WT
0.034483	0.16667	0.052632		2.7012	0.73988	0.69021
0.021739	0.16667	0		0.40468	0	0.61487
0	0	0.11765		0	0.82602	0
0.18182	0	0.088235		1.0696	1.3974	0
0	0.074074	0.088235		0	0.55048	0.88564
0.021277		0		0.61805	0
0				0
0.030303				0.97711
0				0
0				0
0				0
0				0
0.078947				0.87499
0.19231				1.1338
0.068966				0.74904
0.30435				1.2776
0				0
0.088235				0.86656
0.26316				0.81021
0				0
0.005	0.141761	0.324822		0.005	0.47828	0.211979

## Sheet: Kruskal Wallis - to baseline
20 nM DAMGO
HET	WT	KO										HET	KO	WT
0.068966	0.25	0										2.4842	0	0.73943
0.54348	0	0.19444										0.78163	1.0413	0
0.25	0.45882	0										0.86173	0	0.55379
0.090909	0.027027	0										1.1911	0	0.77314
0.44	0.51852	0										0.90956	0	1.1443
0		0.22727										0	0.84566
0.029412												1.0974
0.30303												0.99682
0.52778												1.0528
0.125												1.0221
0.055556												1.0388
0.48												1.0292
0.55263												1.024
0.34615												1.1364
0.44828												1.015
0												0
0.70588												0.59042
0.67647												0.9107
0.52632												0.90053
0.16667												1.1703
Kruskal-Wallis Test						Pairwise Mann-Whitney tests						Kruskal-Wallis Test						Pairwise Mann-Whitney tests
	HET	WT	KO			group 1	group 2	p-value	U-stat	mean			HET	KO	WT			group 1	group 2	p-value	U-stat	mean
median	0.32459	0.25	0			HET	WT	0.454447	38.5	0.0659532		median	1.01855	0	0.73943			HET	KO	0.0216784	22	0.646141
rank sum	371.5	77.5	47			HET	KO	0.0155887	20	0.246542		rank sum	382	53	61			HET	WT	0.110101	26	0.318503
count	20	5	6	31		WT	KO	0.103604	6	0.180588		count	20	6	5	31		KO	WT	0.388861	10	0.327639
r^2/n	6900.61	1201.25	368.167	8470.03								r^2/n	7296.2	468.167	744.2	8508.57
H-stat				6.46003								H-stat				6.92621
H-ties				6.53513								H-ties				7.0053
df				2								df				2
p-value				0.0380991								p-value				0.0301174
alpha				0.05								alpha				0.05
sig				yes								sig				yes
50nM DAMGO
HET	WT	KO										HET	KO	WT
0.034483	0.16667	0.052632										2.7012	0.73988	0.69021
0.021739	0.16667	0										0.40468	0	0.61487
0	0	0.11765										0	0.82602	0
0.18182	0	0.088235										1.0696	1.3974	0
0	0.074074	0.088235										0	0.55048	0.88564
0.021277		0										0.61805	0
0												0
0.030303												0.97711
0												0
0												0
0												0
0												0
0.078947												0.87499
0.19231												1.1338
0.068966												0.74904
0.30435												1.2776
0												0
0.088235												0.86656
0.26316												0.81021
0												0
Kruskal-Wallis Test						Pairwise Mann-Whitney tests						Kruskal-Wallis Test						Pairwise Mann-Whitney tests
	HET	WT	KO			group 1	group 2	p-value	U-stat	mean			HET	KO	WT			group 1	group 2	p-value	U-stat	mean
median	0.021508	0.074074	0.0704335			HET	WT	0.749272	45	0.0172033		median	0.511365	0.64518	0.61487			HET	KO	0.924373	58	0.011488
rank sum	306	87	103			HET	KO	0.590359	51	0.0064875		rank sum	323	100	73			HET	WT	0.749323	45	0.135998
count	20	5	6	31		WT	KO	0.778212	13	0.0236908		count	20	6	5	31		KO	WT	0.779243	13	0.147486
r^2/n	4681.8	1513.8	1768.17	7963.77								r^2/n	5216.45	1666.67	1065.8	7948.92
H-stat				0.335887								H-stat				0.15625
H-ties				0.362884								H-ties				0.168625
df				2								df				2
p-value				0.834067								p-value				0.919144
alpha				0.05								alpha				0.05
sig				no								sig				no
T Test: Two Independent Samples
SUMMARY			Hyp Mean Diff	0								T Test: Two Independent Samples
Groups	Count	Mean	Variance	Cohen d
WT	5	0.0814828	0.00696188									SUMMARY			Hyp Mean Diff	0
KO	6	0.057792	0.0024286									Groups	Count	Mean	Variance	Cohen d
Pooled			0.00444339	0.355404								KO	6	0.58563	0.285542
												WT	5	0.438144	0.169741
T TEST: Equal Variances				Alpha	0.05							Pooled			0.234075	0.304841
	std err	t-stat	df	p-value	t-crit	lower	upper	sig	effect r
One Tail	0.0403639	0.586931	9	0.285839	1.83311			no	0.192004			T TEST: Equal Variances				Alpha	0.05
Two Tail	0.0403639	0.586931	9	0.571677	2.26216	-0.0676186	0.115	no	0.192004				std err	t-stat	df	p-value	t-crit	lower	upper	sig	effect r
												One Tail	0.292963	0.503428	9	0.313377	1.83311			no	0.165495
T TEST: Unequal Variances				Alpha	0.05							Two Tail	0.292963	0.503428	9	0.626753	2.26216	-0.515243	0.810215	no	0.165495
	std err	t-stat	df	p-value	t-crit	lower	upper	sig	effect r
One Tail	0.0423927	0.558841	6.24167	0.297868	1.92979			no	0.218291			T TEST: Unequal Variances				Alpha	0.05
Two Tail	0.0423927	0.558841	6.24167	0.595737	2.42413	-0.0790746	0.126456	no	0.218291				std err	t-stat	df	p-value	t-crit	lower	upper	sig	effect r
												One Tail	0.285549	0.516499	8.97131	0.308998	1.83378			no	0.169933
												Two Tail	0.285549	0.516499	8.97131	0.617995	2.26326	-0.498787	0.793759	no	0.169933

## Sheet: Raw
Genotype	recid	chid	doses	avg_freq	avg_instfreq	avg_amp
Arrb2-het	rec01	c003_IN_2	0	0.096667	0.10419	0.10264
Arrb2-het	rec03	c003_IN_5	0	0.15333	0.16588	0.074001
Arrb2-het	rec05	c002_IN_2	0	0.066667	0.11691	0.23186
Arrb2-het	rec08	c002_IN_2	0	0.036667	0.067088	0.098002
Arrb2-het	rec10	c002_IN_0	0	0.16667	0.18807	0.09425
Arrb2-het	rec13	c002_IN_0	0	0.15667	0.17913	0.12097
Arrb2-het	rec16	c002_IN_2	0	0.11333	0.15473	0.095798
Arrb2-het	rec17	c002_IN_2	0	0.11	0.12444	0.18584
Arrb2-het	rec18	c002_IN_2	0	0.12	0.12813	0.069347
Arrb2-het	rec20	c002_IN_2	0	0.10667	0.14033	0.24438
Arrb2-het	rec23	c002_IN_2	0	0.06	0.074776	0.13969
Arrb2-het	rec28	c002_IN_2	0	0.083333	0.14196	0.24404
Arrb2-het	rec30	c002_IN_2	0	0.12667	0.15262	0.26733
Arrb2-het	rec31	c002_IN_2	0	0.086667	0.10121	0.18015
Arrb2-het	rec32	c002_IN_2	0	0.096667	0.12522	0.63678
Arrb2-het	rec33	c002_IN_2	0	0.076667	0.10919	0.20073
Arrb2-het	rec34	c002_IN_2	0	0.056667	0.093498	0.16505
Arrb2-het	rec36	c002_IN_2	0	0.11333	0.13916	0.1337
Arrb2-het	rec41	c002_IN_2	0	0.063333	0.1251	0.22807
Arrb2-het	rec42	c002_IN_2	0	0.06	0.074965	0.235
Arrb2-ko	rec09	c002_IN_2	0	0.063333	0.068552	0.79482
Arrb2-ko	rec11	c002_IN_2	0	0.12	0.12784	0.088111
Arrb2-ko	rec35	c002_IN_2	0	0.056667	0.11739	0.16958
Arrb2-ko	rec37	c002_IN_2	0	0.11333	0.13922	0.086361
Arrb2-ko	rec39	c002_IN_2	0	0.11333	0.12376	0.31868
Arrb2-ko	rec40	c002_IN_2	0	0.073333	0.086971	0.12533
Arrb2-wt	rec12	c002_IN_2	0	0.04	0.063384	0.17067
Arrb2-wt	rec15	c002_IN_2	0	0.06	0.10518	0.22161
Arrb2-wt	rec22	c002_IN_2	0	0.28333	0.31442	0.12454
Arrb2-wt	rec27	c002_IN_2	0	0.12333	0.19897	0.092166
Arrb2-wt	rec29	c003_IN_2	0	0.18	0.20445	0.12534
Arrb2-het	rec01	c003_IN_2	20	0.0066667	0.12999	0.25497
Arrb2-het	rec03	c003_IN_5	20	0.083333	0.17535	0.057841
Arrb2-het	rec05	c002_IN_2	20	0.016667	0.021781	0.1998
Arrb2-het	rec08	c002_IN_2	20	0.0033333	0.013147	0.11673
Arrb2-het	rec10	c002_IN_0	20	0.073333	0.077265	0.085726
Arrb2-het	rec13	c002_IN_0	20	0	0	0
Arrb2-het	rec16	c002_IN_2	20	0.0033333	0.0068082	0.10513
Arrb2-het	rec17	c002_IN_2	20	0.033333	0.06528	0.18524
Arrb2-het	rec18	c002_IN_2	20	0.063333	0.063171	0.073009
Arrb2-het	rec20	c002_IN_2	20	0.013333	0.03555	0.24979
Arrb2-het	rec23	c002_IN_2	20	0.0033333	0.0017632	0.14511
Arrb2-het	rec28	c002_IN_2	20	0.04	0.049394	0.25116
Arrb2-het	rec30	c002_IN_2	20	0.07	0.10323	0.27374
Arrb2-het	rec31	c002_IN_2	20	0.03	0.053339	0.20472
Arrb2-het	rec32	c002_IN_2	20	0.043333	0.11154	0.64634
Arrb2-het	rec33	c002_IN_2	20	0	0	0
Arrb2-het	rec34	c002_IN_2	20	0.04	0.10354	0.097452
Arrb2-het	rec36	c002_IN_2	20	0.076667	0.11546	0.12176
Arrb2-het	rec41	c002_IN_2	20	0.033333	0.034045	0.20538
Arrb2-het	rec42	c002_IN_2	20	0.01	0.0082438	0.27501
Arrb2-ko	rec09	c002_IN_2	20	0	0	0
Arrb2-ko	rec11	c002_IN_2	20	0.023333	0.054697	0.091749
Arrb2-ko	rec35	c002_IN_2	20	0	0	0
Arrb2-ko	rec37	c002_IN_2	20	0	0	0
Arrb2-ko	rec39	c002_IN_2	20	0	0	0
Arrb2-ko	rec40	c002_IN_2	20	0.016667	0.02747	0.10599
Arrb2-wt	rec12	c002_IN_2	20	0.01	0.024559	0.1262
Arrb2-wt	rec15	c002_IN_2	20	0	0	0
Arrb2-wt	rec22	c002_IN_2	20	0.13	0.14008	0.068966
Arrb2-wt	rec27	c002_IN_2	20	0.0033333	0.0020077	0.071258
Arrb2-wt	rec29	c003_IN_2	20	0.093333	0.10971	0.14343
Arrb2-het	rec01	c003_IN_2	50	0.0033333	0.0037036	0.27725
Arrb2-het	rec03	c003_IN_5	50	0.0033333	0.0019729	0.029946
Arrb2-het	rec05	c002_IN_2	50	0	0	0
Arrb2-het	rec08	c002_IN_2	50	0.0066667	0.042572	0.10483
Arrb2-het	rec10	c002_IN_0	50	0	0	0
Arrb2-het	rec13	c002_IN_0	50	0.0033333	0.0018955	0.074766
Arrb2-het	rec16	c002_IN_2	50	0	0	0
Arrb2-het	rec17	c002_IN_2	50	0.0033333	0.0015207	0.18158
Arrb2-het	rec18	c002_IN_2	50	0	0	0
Arrb2-het	rec20	c002_IN_2	50	0	0	0
Arrb2-het	rec23	c002_IN_2	50	0	0	0
Arrb2-het	rec28	c002_IN_2	50	0	0	0
Arrb2-het	rec30	c002_IN_2	50	0.01	0.062586	0.23391
Arrb2-het	rec31	c002_IN_2	50	0.016667	0.14877	0.20425
Arrb2-het	rec32	c002_IN_2	50	0.0066667	0.028986	0.47697
Arrb2-het	rec33	c002_IN_2	50	0.023333	0.16048	0.25646
Arrb2-het	rec34	c002_IN_2	50	0	0	0
Arrb2-het	rec36	c002_IN_2	50	0.01	0.019003	0.11586
Arrb2-het	rec41	c002_IN_2	50	0.016667	0.032882	0.18478
Arrb2-het	rec42	c002_IN_2	50	0	0	0
Arrb2-ko	rec09	c002_IN_2	50	0.0033333	0.0015405	0.58807
Arrb2-ko	rec11	c002_IN_2	50	0	0	0
Arrb2-ko	rec35	c002_IN_2	50	0.0066667	0.0040644	0.14008
Arrb2-ko	rec37	c002_IN_2	50	0.01	0.2002	0.12068
Arrb2-ko	rec39	c002_IN_2	50	0.01	0.087252	0.17543
Arrb2-ko	rec40	c002_IN_2	50	0	0	0
Arrb2-wt	rec12	c002_IN_2	50	0.0066667	0.0072612	0.1178
Arrb2-wt	rec15	c002_IN_2	50	0.01	0.078659	0.13626
Arrb2-wt	rec22	c002_IN_2	50	0	0	0
Arrb2-wt	rec27	c002_IN_2	50	0	0	0
Arrb2-wt	rec29	c003_IN_2	50	0.013333	0.012432	0.11101
Arrb2-het	rec41	c002_IN_2	70	0.023333	0.046194	0.19991

## Sheet: Shapiro-Wilks-Raw
0nM DAMGO
HET	KO	WT
0.096667	0.063333	0.04
0.15333	0.12	0.06
0.066667	0.056667	0.28333
0.036667	0.11333	0.12333
0.16667	0.11333	0.18
0.15667	0.073333
0.11333
0.11
0.12
0.10667
0.06
0.083333
0.12667
0.086667
0.096667
0.076667
0.056667
0.11333
0.063333
0.06
0.569659	0.116336	0.579691
20nM DAMGO
HET	KO	WT
0.0066667	0	0.01
0.083333	0.023333	0
0.016667	0	0.13
0.0033333	0	0.0033333
0.073333	0	0.093333
0	0.016667
0.0033333
0.033333
0.063333
0.013333
0.0033333
0.04
0.07
0.03
0.043333
0
0.04
0.076667
0.033333
0.01
0.0310125	0.005	0.098884
50nM DAMGO
HET	KO	WT
0.0033333	0.0033333	0.0066667
0.0033333	0	0.01
0	0.0066667	0
0.0066667	0.01	0
0	0.01	0.013333
0.0033333	0
0
0.0033333
0
0
0
0
0.01
0.016667
0.0066667
0.023333
0
0.01
0.016667
0
0.005	0.235315	0.390055

## Sheet: One Way ANOVA - Raw
0nM DAMGO
HET	KO	WT
0.096667	0.063333	0.04
0.15333	0.12	0.06
0.066667	0.056667	0.28333
0.036667	0.11333	0.12333
0.16667	0.11333	0.18
0.15667	0.073333
0.11333
0.11
0.12
0.10667
0.06
0.083333
0.12667
0.086667
0.096667
0.076667
0.056667
0.11333
0.063333
0.06
ANOVA: Single Factor										TUKEY HSD/KRAMER			alpha	0.05
										group	mean	n	ss	df	q-crit
DESCRIPTION					Alpha	0.05				HET	0.0975003	20	0.0245532
Group	Count	Sum	Mean	Variance	SS	Std Err	Lower	Upper		KO	0.0899988	6	0.00408858
HET	20	1.95001	0.0975003	0.00129228	0.0245532	0.010973	0.0750231	0.119977		WT	0.137332	5	0.0387858
KO	6	0.539993	0.0899988	0.000817717	0.00408858	0.0200338	0.0489614	0.131036				31	0.0674276	28	3.499
WT	5	0.68666	0.137332	0.00969645	0.0387858	0.021946	0.0923777	0.182286		Q TEST
										group 1	group 2	mean	std err	q-stat	lower	upper	p-value	mean-crit	Cohen d
ANOVA										HET	KO	0.00750142	0.0161518	0.464432	-0.0490137	0.0640166	0.942405	0.0565151	0.152863
Sources	SS	df	MS	F	P value	Eta-sq	RMSSE	Omega Sq		HET	WT	0.0398317	0.0173498	2.2958	-0.0208753	0.100539	0.252709	0.060707	0.811689
Between Groups	0.00750394	2	0.00375197	1.55804	0.228256	0.100144	0.518422	0.0347517		KO	WT	0.0473332	0.0210117	2.25271	-0.0261867	0.120853	0.265291	0.0735198	0.964552
Within Groups	0.0674276	28	0.00240813
Total	0.0749315	30	0.00249772
T Test: Two Independent Samples
SUMMARY			Hyp Mean Diff	0
Groups	Count	Mean	Variance	Cohen d
KO	6	0.0899988	0.000817717
WT	5	0.137332	0.00969645
Pooled			0.00476382	0.685785
T TEST: Equal Variances				Alpha	0.05
	std err	t-stat	df	p-value	t-crit	lower	upper	sig	effect r
One Tail	0.0417939	1.13254	9	0.143339	1.83311			no	0.353183
Two Tail	0.0417939	1.13254	9	0.286679	2.26216	-0.141878	0.0472113	no	0.353183
T TEST: Unequal Variances				Alpha	0.05
	std err	t-stat	df	p-value	t-crit	lower	upper	sig	effect r
One Tail	0.0455585	1.03895	4.56393	0.175352	2.05837			no	0.437348
Two Tail	0.0455585	1.03895	4.56393	0.350704	2.64624	-0.167892	0.0732256	no	0.437348

## Sheet: Kruskal Wallis - Raw
20nM DAMGO
HET	KO	WT
0.0066667	0	0.01
0.083333	0.023333	0
0.016667	0	0.13
0.0033333	0	0.0033333
0.073333	0	0.093333
0	0.016667
0.0033333
0.033333
0.063333
0.013333
0.0033333
0.04
0.07
0.03
0.043333
0
0.04
0.076667
0.033333
0.01
Kruskal-Wallis Test						Pairwise Mann-Whitney tests
	HET	KO	WT			group 1	group 2	p-value	U-stat	mean
median	0.0316665	0	0.01			HET	KO	0.0198384	21.5	0.0254999
rank sum	357.5	50.5	88			HET	WT	0.972813	49	0.0151667
count	20	6	5	31		KO	WT	0.213259	8	0.0406666
r^2/n	6390.31	425.042	1548.8	8364.15
H-stat				5.17928
H-ties				5.25343
df				2
p-value				0.0723158
alpha				0.05
sig				no
50nM DAMGO
HET	KO	WT
0.0033333	0.0033333	0.0066667
0.0033333	0	0.01
0	0.0066667	0
0.0066667	0.01	0
0	0.01	0.013333
0.0033333	0
0
0.0033333
0
0
0
0
0.01
0.016667
0.0066667
0.023333
0
0.01
0.016667
0
Kruskal-Wallis Test						Pairwise Mann-Whitney tests
	HET	KO	WT			group 1	group 2	p-value	U-stat	mean
median	0.0033333	0.005	0.0066667			HET	KO	0.726085	54	0.00016668
rank sum	308	100.5	87.5			HET	WT	0.694979	44	0.00083326
count	20	6	5	31		KO	WT	0.849986	13.5	0.00099994
r^2/n	4743.2	1683.38	1531.25	7957.82
H-stat				0.264012
H-ties				0.288119
df				2
p-value				0.865836
alpha				0.05
sig				no
T Test: Two Independent Samples
SUMMARY			Hyp Mean Diff	0
Groups	Count	Mean	Variance	Cohen d
KO	6	0.005	2.11112e-05
WT	5	0.00599994	3.55543e-05
Pooled			2.75304e-05	0.190576
T TEST: Equal Variances				Alpha	0.05
	std err	t-stat	df	p-value	t-crit	lower	upper	sig	effect r
One Tail	0.00317718	0.314726	9	0.380072	1.83311			no	0.104336
Two Tail	0.00317718	0.314726	9	0.760144	2.26216	-0.00818722	0.00618734	no	0.104336
T TEST: Unequal Variances				Alpha	0.05
	std err	t-stat	df	p-value	t-crit	lower	upper	sig	effect r
One Tail	0.00326028	0.306704	7.47391	0.383719	1.87666			no	0.111488
Two Tail	0.00326028	0.306704	7.47391	0.767438	2.33457	-0.00861127	0.00661139	no	0.111488
